# Supplementary material for: Biomarker quantification by multiplexed quantum dot technology for predicting lymph node metastasis and prognosis in head and neck cancer
Source: PubMed Central journal article supplement (PMC5190127; doi:10.18632/oncotarget.9225), 2016-05-09
Supplement: oncotarget-07-44676-s001.pdf [file oncotarget-07-44676-s001.pdf]

# Biomarker quantification by multiplexed quantum dot technology for predicting lymph node metastasis and prognosis in head and neck cancer

## Supplementary Materials

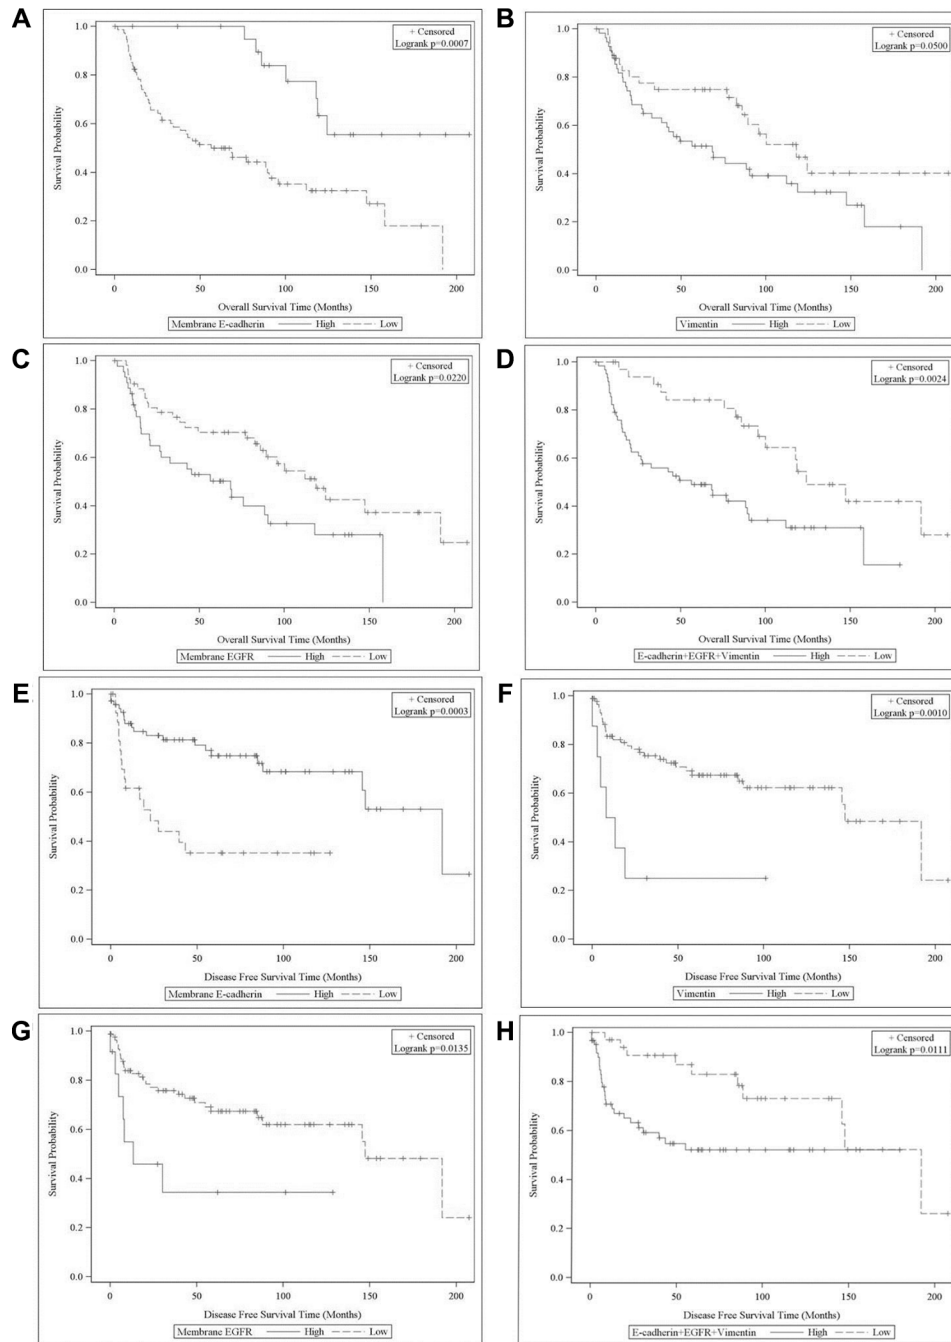

**Supplementary Figure S1: KM curves of OS (A to D) and DFS (E to H) for membranous E-cadherin (A and E), cytoplasmic vimentin (B and F), membranous EGFR (C and G), and all three biomarkers (D and H) cut by the optimal cut-point driven by survival analysis.**

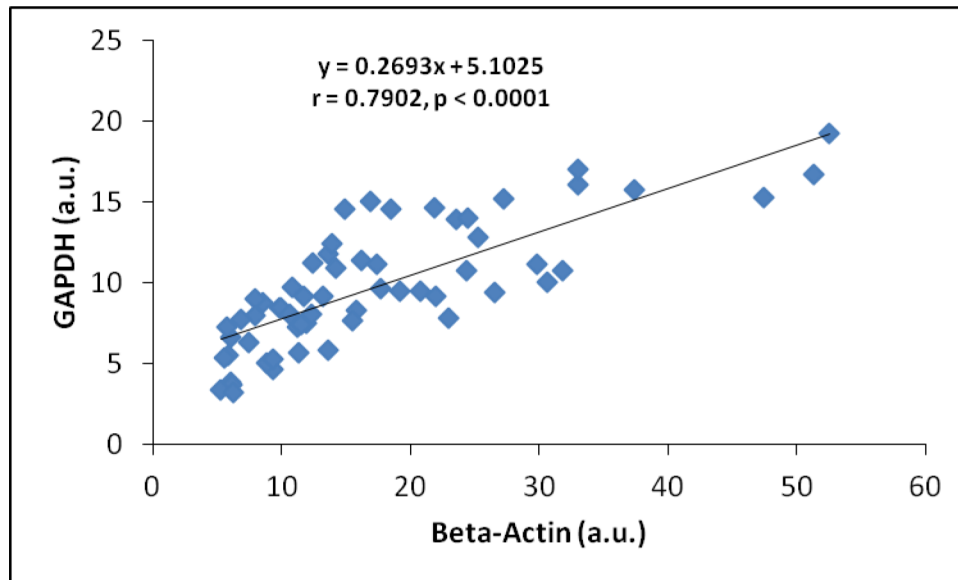

**Supplementary Figure S2: Correlation of QD-IF signal (arbitrary units) of GAPDH with that of  $\beta$ -actin.** Premixed chicken anti-human  $\beta$ -actin (1:1000) and rabbit anti-human GAPDH (1:500) (Trevigen, Gaithersburg, MD) was incubated with tumor slides at 4°C overnight, followed by incubation with a mixture of goat anti-chicken conjugated-QD655 for  $\beta$ -actin (1:100) and goat anti-rabbit conjugated-QD705 for GAPDH (1:50) (Invitrogen, Carlsbad, CA) for 1 hour at 37°C in a humid environment. Quantification was performed on 60 randomly selected images by CRi spectral imaging system (Caliper/Perkin Elmer Life Sciences and Technology, Hopkinton, MA) with Nuance v3.1 software. Correlation was determined by Pearson correlation using SigmaPlot 12.0, Systat Software Inc, San Jose, CA).

**Supplementary Table S1: Summary of cut-off points for different sensitivities and specificities with metastasis vs. no metastasis**

| Parameter                                                                                                                                                                                      | Sensitivity = 90%                      | Specificity = 90%                      | Maximize sum of specificity and sensitivity                          | $\geq 50\%$ to be Metastasis           |
|------------------------------------------------------------------------------------------------------------------------------------------------------------------------------------------------|----------------------------------------|----------------------------------------|----------------------------------------------------------------------|----------------------------------------|
| <i>Model, adjusted for E-cadherin, EGFR, Grade, Age and Gender:</i>                                                                                                                            |                                        |                                        |                                                                      |                                        |
| Cut-off = $-0.0253 \cdot \text{Age} + 0.1098 \cdot \text{SexMale} + 0.649 \cdot \text{Grade\_MD} - 1.4703 \cdot \text{Grade\_WD} - 0.6291 \cdot \text{MemE-cad} + 0.3465 \cdot \text{MemEGFR}$ | Specificity = 85.4%<br>Cut-off = 0.246 | Sensitivity = 85.7%<br>Cut-off = 0.246 | Sensitivity = 83.7%<br>Specificity = 87.5%<br><b>Cut-off = 0.320</b> | <b>Cut-off <math>\geq 0.012</math></b> |

**Supplementary Table S2: Univariate OS analysis**

| Covariate       | Level  | N  | Overall Survival Time (Months) |            |           |            | P-value |
|-----------------|--------|----|--------------------------------|------------|-----------|------------|---------|
|                 |        |    | Hazard Ratio                   | 95% CI Low | 95% CI Up | HR P-value |         |
| Metastasis      | Yes    | 49 | 2.365                          | 1.355      | 4.128     | 0.002      | 0.002   |
|                 | No     | 48 | –                              | –          | –         | –          |         |
| Sex             | Male   | 62 | 0.988                          | 0.563      | 1.733     | 0.966      | 0.966   |
|                 | Female | 35 | –                              | –          | –         | –          |         |
| Tumor size      | T1     | 28 | 0.595                          | 0.273      | 1.297     | 0.192      | 0.478   |
|                 | T2     | 36 | 0.609                          | 0.292      | 1.270     | 0.186      |         |
|                 | T3     | 16 | 0.585                          | 0.251      | 1.363     | 0.214      |         |
|                 | T4     | 17 | –                              | –          | –         | –          |         |
| Differentiation | MD     | 62 | 0.941                          | 0.462      | 1.917     | 0.866      | 0.962   |
|                 | PD     | 19 | 0.878                          | 0.354      | 2.177     | 0.779      |         |
|                 | WD     | 16 | –                              | –          | –         | –          |         |
| Smoking         | Yes    | 74 | 0.879                          | 0.470      | 1.643     | 0.685      | 0.685   |
|                 | No     | 23 | –                              | –          | –         | –          |         |

| Overall Survival Time (Months) |       |    |              |            |           |            |         |
|--------------------------------|-------|----|--------------|------------|-----------|------------|---------|
| Covariate                      | Level | N  | Hazard Ratio | 95% CI Low | 95% CI Up | HR P-value | P-value |
| Age                            |       | 97 | 1.034        | 1.008      | 1.060     | 0.010      | 0.010   |
| Membranous E-cadherin          |       | 97 | 0.868        | 0.791      | 0.951     | 0.002      | 0.002   |
| Cytoplasmic vimentin           |       | 97 | 1.070        | 1.012      | 1.130     | 0.016      | 0.016   |
| Membranous EGFR                |       | 97 | 1.046        | 1.007      | 1.088     | 0.022      | 0.021   |

**Supplementary Table S3: Univariate DFS analysis**

| Disease Free Survival Time (Months) |        |    |              |            |           |            |         |
|-------------------------------------|--------|----|--------------|------------|-----------|------------|---------|
| Covariate                           | Level  | N  | Hazard Ratio | 95% CI Low | 95% CI Up | HR P-value | P-value |
| Metastasis                          | Yes    | 49 | 2.699        | 1.339      | 5.439     | 0.005      | 0.004   |
|                                     | No     | 48 | –            | –          | –         | –          |         |
| Sex                                 | Male   | 62 | 0.865        | 0.440      | 1.698     | 0.673      | 0.672   |
|                                     | Female | 35 | –            | –          | –         | –          |         |
| Tumor size                          | 1      | 28 | 1.117        | 0.408      | 3.059     | 0.830      | 0.411   |
|                                     | 2      | 36 | 0.945        | 0.348      | 2.567     | 0.912      |         |
|                                     | 3      | 16 | 0.389        | 0.097      | 1.563     | 0.183      |         |
|                                     | 4      | 17 | –            | –          | –         | –          |         |
| Differentiation                     | MD     | 62 | 1.192        | 0.484      | 2.937     | 0.702      | 0.836   |
|                                     | PD     | 19 | 0.935        | 0.301      | 2.906     | 0.907      |         |
|                                     | WD     | 16 | –            | –          | –         | –          |         |
| Smoking                             | Yes    | 74 | 0.944        | 0.427      | 2.087     | 0.887      | 0.887   |
|                                     | No     | 23 | –            | –          | –         | –          |         |
| Age                                 |        | 97 | 1.016        | 0.986      | 1.046     | 0.296      | 0.296   |
| Membranous E-cadherin               |        | 97 | 0.892        | 0.801      | 0.994     | 0.038      | 0.033   |
| Cytoplasmic vimentin                |        | 97 | 1.056        | 0.987      | 1.130     | 0.117      | 0.117   |
| Membranous EGFR                     |        | 97 | 1.034        | 0.986      | 1.084     | 0.173      | 0.171   |

**Supplementary Table S4: Multivariable predictive model of OS**

| Overall Survival Time (Months) |       |              |            |           |            |         |
|--------------------------------|-------|--------------|------------|-----------|------------|---------|
| Covariate                      | Level | Hazard Ratio | 95% CI Low | 95% CI Up | HR P-value | P-value |
| Membranous E-cadherin          |       | 0.904        | 0.816      | 1.002     | 0.056      | 0.056   |
| Cytoplasmic vimentin           |       | 1.067        | 1.005      | 1.133     | 0.033      | 0.033   |
| Age                            |       | 1.048        | 1.020      | 1.076     | < .001     | < .001  |

**Overall Survival Time (Months)**

| <b>Covariate</b> | <b>Level</b> | <b>Hazard Ratio</b> | <b>95% CI Low</b> | <b>95% CI Up</b> | <b>HR <i>P</i>-value</b> | <b><i>P</i>-value</b> |
|------------------|--------------|---------------------|-------------------|------------------|--------------------------|-----------------------|
| Metastasis       | Yes          | 2.120               | 1.135             | 3.961            | 0.018                    | 0.018                 |
|                  | No           | –                   | –                 | –                | –                        |                       |

Backward selection with an alpha level of removal at .1 was used. Differentiation, membranous EGFR, Sex, Smoking, and tumor stage were removed from the model.

**Supplementary Table S5: Multivariable predictive model of DFS****Disease Free Survival Time (Months)**

| <b>Covariate</b> | <b>Level</b> | <b>Hazard Ratio</b> | <b>95%CI Low</b> | <b>95%CI Up</b> | <b>HR <i>P</i>-value</b> | <b><i>P</i>-value</b> |
|------------------|--------------|---------------------|------------------|-----------------|--------------------------|-----------------------|
| Age              |              | 1.027               | 0.998            | 1.057           | 0.071                    | 0.071                 |
| Metastasis       | Yes          | 3.137               | 1.527            | 6.445           | 0.002                    | 0.002                 |
|                  | No           | –                   | –                | –               | –                        |                       |

Backward selection with an alpha level of removal at .1 was used. Differentiation, membranous EGFR, membranous E-cadherin, Sex, Smoking, tumor stage, and cytoplasmic vimentin were removed from the model.
